# Supplementary material
Source: Research Square preprint supplement (doi:10.21203/rs.3.rs-9905515/v1)
Supplement: Supplementary file 1 [file 403421728d6ff78cbc611843.docx]

**Table 1**: Risk of bias results using the Risk Of Bias In Non-randomized Studies of Exposure (ROBINS-E).

| **Study** | | **Bias due to confounding** | **Bias in the measurement of exposure** | **Bias in selecting participants** | **Bias due to post-exposure intervention** | **Bias due to missing data** | **Bias in measurement of outcomes** | **Bias in selection of the reported results** | **Overall** |
| --- | --- | --- | --- | --- | --- | --- | --- | --- | --- |
| Bhagyajyoti 2018 | |  |  |  |  |  |  |  |  |
| Choi 2021 | |  |  |  |  |  |  |  |  |
| Garcia-Alfaro 2020 | |  |  |  |  |  |  |  |  |
| Bergamaschi 2019 | |  |  |  |  |  |  |  |  |
| Vallibhakara 2025 | |  |  |  |  |  |  |  |  |
| Castro 2018 | |  |  |  |  |  |  |  |  |
| Olaniyan 2016 | |  |  |  |  |  |  |  |  |
| Ayaki 2016 | |  |  |  |  |  |  |  |  |
| Sahai 2005 | |  |  |  |  |  |  |  |  |
| Garcia-Marques 2022 | |  |  |  |  |  |  |  |  |
| Ayaki 2024 | |  |  |  |  |  |  |  |  |
| Chen 2013 | |  |  |  |  |  |  |  |  |
| Shakoor 2022 | |  |  |  |  |  |  |  |  |
| Li 2015 | |  |  |  |  |  |  |  |  |
| Pereira 2017 | |  |  |  |  |  |  |  |  |
| Zhao 2024 | |  |  |  |  |  |  |  |  |
| Low |
| Some concerns |
| High |
